# Supplementary material
Source: publisher site journal article supplement (https://www.kjim.org/upload/media/kjim-2022-072-suppl2.pdf)
Supplement: Supplementary file 1 [file kjim-2022-072-suppl2.pdf]

**Supplementary Table 2. Microbiological and auto-antibodies investigations**

|                                                                                                  | Tested patients |
|--------------------------------------------------------------------------------------------------|-----------------|
| Microbiological tests <sup>a</sup>                                                               |                 |
| Sputum culture                                                                                   | 11/11           |
| Bacterial multiplex PCR assays <sup>b</sup> (sputum or BAL fluid)                                | 8/11            |
| Respiratory virus multiplex PCR assays <sup>c</sup> (nasopharyngeal swabs, sputum, or BAL fluid) | 8/11            |
| BAL fluid or tracheal aspirate culture                                                           | 6/11            |
| Cytomegalovirus PCR assay (BAL fluid or tracheal aspirate)                                       | 6/11            |
| Acid-fast bacillus smear, culture, and PCR assay                                                 | 9/11            |
| Serum anti- <i>Mycoplasma pneumoniae</i> IgM                                                     | 7/11            |
| Serum anti- <i>Chlamydomphila pneumoniae</i> IgM                                                 | 7/11            |
| Urine <i>Legionella pneumophila</i> antigen assay                                                | 5/11            |
| Urine <i>Streptococcus pneumoniae</i> antigen assay                                              | 6/11            |
| <i>Pneumocystis carinii</i> PCR assay (BAL fluid)                                                | 5/11            |
| Auto-antibodies tests                                                                            |                 |
| Antinuclear antibodies                                                                           | 11/11           |
| Anti-Ro/SSA antibody                                                                             | 11/11           |
| Anti-La/SSB antibody                                                                             | 11/11           |
| Rheumatoid factor                                                                                | 11/11           |
| Anti-citrullinated peptide antibody                                                              | 11/11           |
| Anti-dsDNA antibody                                                                              | 9/11            |
| Anti-Sm antibody                                                                                 | 8/11            |
| Anti-U1RNP antibody                                                                              | 8/11            |
| Anti-Scl-70 antibody                                                                             | 8/11            |
| ANCA, anti-proteinase 3 antibody                                                                 | 9/11            |
| ANCA, anti-myeloperoxidase antibody                                                              | 9/11            |
| Anti-Jo-1 antibody                                                                               | 8/11            |

PCR, polymerase chain reaction; BAL, bronchoalveolar lavage; IgM, immunoglobulin M; dsDNA, double-stranded DNA; ANCA, anti-neutrophil cytoplasmic antibodies.

<sup>a</sup>In all patients, the results of all microbiological tests were negative.

<sup>b</sup>Bacterial multiplex PCR assays: *Bordetella pertussis*, *Bordetella parapertussis*, *Chlamydomphila pneumoniae*, *Haemophilus influenzae*, *Legionella pneumophila*, *Mycoplasma pneumoniae*, *Streptococcus pneumoniae*.

<sup>c</sup>Adenovirus, human bocavirus, human rhinovirus, human coronavirus (229E, OC43), influenza virus (Flu A, Flu B), parainfluenza virus (PIV 1, 2, 3), respiratory syncytial virus (RSV A, RSV B), and metapneumovirus.
